# Supplementary material for: The sicariid spiders in the state of Bahia, Brazil (Arachnida: Araneae)
Source: PeerJ. 2024 Aug 29;12:e17942. doi: 10.7717/peerj.17942 (PMC11423805; doi:10.7717/peerj.17942)
Supplement: Supplemental Information 1 [file peerj-12-17942-s001.xlsx]

## Sheet: Planilha1
Distribution of Sicariidae Spiders by Municipalities of Bahia, Related to Environmental Data (biome, phytophysiology/environment, altitude, temperature, rainfall)
Taxa	Municipalities (* = new record)	Location	Coordinates	Acronyms in Collection (*)			Reference article	Biome	Environment, Phytophysiognomy	Altitude (m)	Average Annual Temperature (°C)	Rainfall (mm)
-	-	-	-	UFBA-ARA	UFMG-ARA	IBSP	-	-	-	-	-	-
Loxosceles sp.	Caetité	Bahia Mineração S.A. (BAMIN)	(42°28' 29"W, 14°04' 10"S)	3607, 3608, 3611, 3613, 3626, 4608, 4609, 4611, 4612, 4614, 4615, 4616				Caatinga; Cerrado	Indeterminated	824	22	885
	Ibicoara*	Indeterminated	(41°17'04"W, 13°24'39"S)	1512				Caatinga	Cave	1027	20.1	1037
	Ituaçu	Indeterminated	(41°17' 47"W, 13°48' 48"S)	145				Caatinga	Cave	520	21.5	967
	Jacobina*	Malhadinha	(40°31' 06"W, 11°10' 51"S)	3947				Caatinga	Indeterminated	463	23.0	751
	Jacobina*	Toca de Areia	(40°31' 06"W, 11°10' 51"S)	4423				Caatinga	Cave	463	23.0	751
	Lençóis	Gruta do Lapão	(41°23'23" W, 12°33'48"S)	4375, 4376, 4380, 4384, 4385, 4386, 4387, 4388, 4389, 4390,4391, 4395, 4397, 4400, 4402, 4403, 4404, 4405, 4406, 4407, 4409, 4410, 4411, 4414, 4415, 4419, 4420, 4506, 4507, 4761, 4764, 4766				Caatinga	Cave	394	2022-08-21	637
	Maracás	Vanádio de Maracás	(40°25'50"W, 13°26'28"S)	5079				Caatinga; Atlantic Forest	Indeterminated	964	21.0	750
	Palmeiras	Gruta do Riachinho	(41°33'31"W, 12°31'44"S)	4781				Caatinga	Cave	870	21.0	637
	Pau Brasil *	Gruta Milagrosa	(39°39'01"W, 15°27'55"S)		1942			Atlantic Forest	Cave	188	2022-04-23	863
	Pau Brasil *	Gruta do Córrego Verde	(39°39'01"W, 15°27'55"S)		1943			Atlantic Forest	Cave	188	2022-04-23	863
	Pau Brasil *	Toca dos Morcegos	(39°39' 01"W, 15°27' 55"S)		1945			Atlantic Forest	Cave	188	2022-04-23	863
	Santa Rita de Cássia *	Indeterminated	(44°31'09"W, 11°00'31"S)	1111				Caatinga; Cerrado	Indeterminated	440	2022-08-26	861
Total of individuals per collection				74	15	-
Loxosceles amazonica	Buritirama	Indeterminated	(43°37'49"W, 10°42'29"S)	1606			Brazil, T.K.; Pinto-Leite, C.M.; Almeida-Silva, L.M.;Lira-da-Silva, R.M.; Brescovit, A.D, 2009	Caatinga	Indeterminated	492	2022-05-26	749
	Paulo Afonso*	Estação Ecologica Raso da Catarina	(38°29'29" W, 9°34'53"S)			165656		Caatinga	Indeterminated	243	2022-09-25	367
	Salvador *	Lagoa do Abaeté	(38°30'39"W, 12°58'17"S)			10331		Atlantic Forest	Dunes; Arboreous Formations of Restingas	8	2022-06-25	1235
	Santa Rita de Cássia	Indeterminated	(44°31'09"W, 11°00'31"S)				Brazil, T.K.; Pinto-Leite, C.M.; Almeida-Silva, L.M.;Lira-da-Silva, R.M.; Brescovit, A.D, 2009	Caatinga; Cerrado	Indeterminated	440	2024-08-26	861
Total of individuals per collection				1	-	2
Loxosceles boqueirao	Carinhanha	Lapa do Boqueirão	(44°02′18″ W, 13°46′51″S)				Bertani, Bichuette, Cordeiro & Gallão, 2024	Caatinga	Cave	440	2022-03-26	665
Total of individuals per collection				-	-	-
Loxosceles cardosoi	Carinhanha	Gruna da Altina	(43°45'W, 13°33'S)				. Bertani, R.; Von Schimonsky, D.; Gallão, J.; Bichuette, M., 2018:	Caatinga	Cave	496	2022-03-26	665
Total of individuals per collection				-	-	-
Loxosceles carinhanha	Carinhanha	Gruna Água Fina	(43°48'W, 13°41'S)				. Bertani, R.; Von Schimonsky, D.; Gallão, J.; Bichuette, M., 2018	Caatinga	Cave	484	2022-03-26	665
Total of individuals per collection				-	-	-
Loxosceles chapadensis	Iraquara	Fazenda Pratinha	(41°32'04"W, 12°21'01"S)				Bertani, Fukushima & Nagahama, 2010	Caatinga	Indeterminated	655	2022-02-22	687
	Iraquara	Gruta da Lapa Doce *	(41°37'10"W, 12°14'56"S)		12045			Caatinga	Cave	655	2022-02-22	687
	Iraquara	Gruta da Torrinha *	(41°37'10"W, 12°14'56"S)	5612				Caatinga	Cave	655	2022-02-22	687
	Ituaçu *	Gruta da Mangabeira	(41°17'47"W, 13°48'48"S)		12095; 15373			Caatinga	Cave	522	2022-05-21	967
	Lençóis	Gruta do Lapão *	(41°23'23"W, 12°33'48"S)	3564, 3565, 3612, 3615, 3664, 4168, 4169, 4378, 4381, 4382, 4393, 4394, 4398, 4401, 4408, 4412, 4416, 4417, 4421, 4422, 4503, 4562, 4754, 4755, 4759, 4763, 4768, 4772, 4823, 4900	12103; 12104; 12105	165648; 165649; 165650; 165651;165652;165653;165654		Caatinga	Cave	394	2022-08-21	637
	Lençóis	Indeterminated	(41°23'23" W, 12°33'48"S)				Bertani, Fukushima & Nagahama, 2010	Caatinga	Indeterminated	394	2022-08-21	637
	Maracás *	Indeterminated	(40°25'50"W, 13°26'28"S)	4476				Caatinga; Atlantic Forest	Indeterminated	964	21.0	750
	Palmeiras	Indeterminated	(41°33'31"W, 12°31'44"S)				Bertani, Fukushima & Nagahama, 2010	Caatinga	Cave	870	21.0	637
	Palmeiras	Gruta do Riachinho*	(41°33'31"W, 12°31'44"S)	4491; 4779; 4780				Caatinga	Cave	870	21.0	637
Total of individuals per collection				52	13	32
Loxosceles karstica	Caetité *	Bahia Mineração S.A. (BAMIN)	(42°28'29"W, 14°04'10"S)	3609; 3610; 3625; 4607; 4610; 5419				Caatinga; Cerrado	Indeterminated	824	22	885
	Carinhanha	Gruna do Cocho	(43°46'W, 13°36'S)				. Bertani, R.; Von Schimonsky, D.; Gallão, J.; Bichuette, M., 2018	Caatinga	Cave	514	2022-03-26	665
	Maracás *	Indeterminated	(40°25'50"W, 13°26'28"S)	4770; 4774; 4775; 5102				Caatinga; Atlantic Forest	Indeterminated	964	21.0	750
	Paulo Afonso *	Barragem da Usina Hidrelétrica Luiz Gonzaga	(38°12'52"W, 9°24'22"S)	1072				Caatinga	Park Steppe Savanna	243	2022-09-25	367
Total of individuals per collection				18	-	-
Loxosceles similis	Guanambi *	Indeterminated	(42°46'52"W, 14°13'25"S )	2673				Caatinga; Cerrado	Indeterminated	530	2022-03-25	491
	Palmeiras*	Vale do Capão	(41°33' 31"W, 12°31'44"S)			165464		Caatinga	Indeterminated	870	21.0	637
	Pau Brasil	Indeterminated	(39°39'04"W, 15°27'51"S)				Brazil, T.K.; Pinto-Leite, C.M.; Almeida-Silva, L.M.;Lira-da-Silva, R.M.; Brescovit, A.D, 2009	Atlantic Forest	Indeterminated	169	2024-04-23	863
	Pé de Serra*	Fazenda Vanádio de Marácas	(39°36'44"W, 11°50' 03"S)	2652; 2653				Caatinga	Indeterminated	286	25.0	514
	Ubaíra*	Fazenda Lagoa do Boi	(39°40'06.2"W, 13°16' 01"S)	2674; 3560; 3561; 3562; 3563				Atlantic Forest	Dense Rainforest	324	2022-05-21	819
Total of individuals per collection				14	-	1
Loxosceles troglobia	Malhada	Gruta Tapera D'Água	(43 40'58.23"W, 14°31'2.17"S)			213031; 213032	Souza & Ferreira, 2018	Caatinga	Cave	433	2022-03-26	665
	Iuiu	Gruta Taboca	(43°41’10.87”W, 14°35’13.11”S)				Souza & Ferreira, 2018	Caatinga	Cave	490	2023-05-25	804
Total of individuals per collection				-	-	2
Sicarius sp.	Barra	Brejo Olhos D`água	(43°21'10"W, 10°48'27"S)			11017, 11684		Caatinga	Dunes; Restinga	450	2023-04-27	559
	Caetité	Indeterminated	(42°28'29"W, 14°04'10"S)	4606				Caatinga; Cerrado	Indeterminated	824	22	885
	Curaça	Indeterminated	(39°54'33"W, 8°59'26"S)	4654				Caatinga	Indeterminated	330	2022-07-26	413
	Ituaçu	Gruta da Mangabeira	(41°17'47"W, 13°48'48"S)	814, 815				Caatinga	Cave	522	2022-05-21	967
	Morro do Chapéu	Indeterminated	(41°12'25"W, 11°35'27"S)			11685, 11020		Caatinga	Rupestrian grassland and pasture	1011	2023-07-20	544
	Morro do Chapéu	Parque Estadual Morro do Chapéu	(41°15'05"W, 11°29'57"S)			11025, 11021, 11023, 11024, 11022 , 11686		Caatinga	Rupestrian grassland and pasture	1011	2023-07-20	544
	Palmeiras*	Vale do Capão	(41°33'31"W, 12°31'44"S)	4901				Caatinga	Indeterminated	870	21.0	637
	Xique - xique	Indeterminated	(42°43'46"W, 11°04'49"S)			11687, 11027		Caatinga	Rupestrian grassland	419	2023-02-27	484
Total of individuals per collection				5	-	12
Sicarius cariri	Cachoeira *	Rio da Prata, Fazenda Caimbongo	(38°57'21"W, 12°37'06"S)	4672				Atlantic Forest	Dense Rainforest	5	2022-01-24	892
	Caetité *	Indeterminated	(42°28'29"W, 14°04'10"S)	3603, 3604, 3605, 4605				Caatinga; Cerrado	Indeterminated	824	22	885
	Campo Formoso	Gruta da Boa Vista	(40°51'35''W, 10°9'45''S)				Magalhães, Brescovit & Santos 2013	Caatinga	Cave	556	2022-04-24	515
	Campo Formoso	Gruta Morrinho	(40°55'5''W, 10°12'33''S)				Magalhães, Brescovit & Santos 2013	Caatinga	Cave	556	2022-04-24	515
	Campo Formoso	Toca do Angico *	(40° 19' 16" W, 10° 30' 27"S)			210113		Caatinga	Cave	556	2022-04-24	515
	Campo Formoso	Gruta Lapa do Convento *	(40°19'16" W, 10°30'27"S)			260652		Caatinga	Cave	556	2022-04-24	515
	Canudos	Indeterminated	(39°01'35"W, 9°53'48"S)				Magalhães, Brescovit & Santos 2013	Caatinga	Indeterminated	402	29.4	294
	Central	Indeterminated	(42°6'46''W, 11°8'8''S)				Magalhães, Brescovit & Santos 2013	Caatinga	Indeterminated	698	2022-01-25	515
	Central	Abrigo Waldemar II *	(42°6'46''W, 11°8'8''S)			13409		Caatinga	Park Steppe Savanna	698	2022-01-25	515
	Central	Fazenda Paulo	(42°6'46''W, 11°8'8''S)				Magalhães, Brescovit & Santos 2013	Caatinga	Indeterminated	698	2022-01-25	515
	Central	Peixe-Candeia	(42°6'46''W, 11°8'8''S)				Magalhães, Brescovit & Santos 2013	Caatinga	Indeterminated	698	2022-01-25	515
	Central	Roça do Paulo	(42°6'46''W, 11°8'8''S)				Magalhães, Brescovit & Santos 2013	Caatinga	Indeterminated	698	2022-01-25	515
	Central	Toca Esperança	Indeterminated				Magalhães, Brescovit & Santos 2013	Caatinga	Indeterminated	698	2022-01-25	515
	Curaçá	Riacho Seco	(39°54' 33"W, 8°59'26"S)			161060; 161063	Magalhães, Brescovit & Santos 2013	Caatinga	Indeterminated	330	2023-07-26	413
	Gentio do Ouro *	Vila de Santo Inácio	(42° 30' 09"W, 11°25'45"S)	5291; 5292; 5293; 5294; 5296; 5297; 5322; 5323; 5324				Caatinga	Indeterminated	1098	2022-05-22	686
	Itaguaçu da Bahia	Indeterminated	(42°23'58''W, 11°0'42''S )			28959	Magalhães, Brescovit & Santos 2013	Caatinga	Indeterminated	436	2022-09-25	506
	Jaborandi	Borders on Posse/GO	(46°0'12''W, 13°55'54''S)				Magalhães, Brescovit & Santos 2013	Caatinga; Cerrado	Indeterminated	960	25.0	705
	Jaguarari	Toca do Angico	(40°17'59''W, 10°14'16''S )				Magalhães, Brescovit & Santos 2013	Caatinga	Cave	662	2022-06-22	542
	Lajedinho *	Indeterminated cave	(40°54'20"W, 12°21'21"S)			182319; 182324		Caatinga	Cave	530	2022-06-22	756
	Miguel Calmon	Distrito de Bagres	(40°35'40.4''W, 11°19'31.8''S)			162256; 162257	Magalhães, Brescovit & Santos 2013	Caatinga	Indeterminated	512	2022-05-22	757
	Paripiranga	Indeterminated	(37°55'2''W, 10°37'19''S )		11731		Magalhães, Brescovit & Santos 2013	Caatinga	Indeterminated	434	2022-09-23	649
	Paulo Afonso	Estação Ecológica Raso da Catarina	(38°28'15.1''W, 9°39'58.1''S )		13633; 13632; 12210	3752; 3755; 7259; 162686; 162694; 163685; 163687; 163688	Magalhães, Brescovit & Santos 2013	Caatinga	Indeterminated	586	2022-09-25	367
	Queimadas	Indeterminated	(39°37'28''W, 10°58'40''S)			39283; 42358	Magalhães, Brescovit & Santos 2013	Caatinga	Indeterminated	295	2023-04-25	481
	Salvador	Lagoa do Abaeté	(38°30'39"W, 12°58'17"S)			10330	Magalhães, Brescovit & Santos 2013	Atlantic Forest	Dunes ; Arboreous Formations of Restingas	8	2022-06-25	1235
	Santa Teresinha	Indeterminated	(39°31'22''W, 12°46'19''S )				Magalhães, Brescovit & Santos 2013	Caatinga; Atlantic Forest	Wooded Steppe Grassland	227	2022-03-23	633
	Senhor de Bonfim	Campus VII da UNEB	(40°10’W, 10°26’S)			133729; 133730; 133731; 133732; 133733; 133734; 133735; 133736; 133737; 133738; 133739; 133740; 133741; 133742; 133743; 133744; 133745; 133746; 133747	Magalhães, Brescovit & Santos 2013	Caatinga	Urban	606	2022-06-25	768
	Una *	Estação Ecológica Uruçu	(39°04'31"W, 15°17'36"S)			27793		Atlantic Forest	Indeterminated	28	2022-08-23	1432
Total of individuals per collection				12	4	63
Sicarius diadorim	Cocos	Fazenda Trijunção	(45°58'23''W, 14°49'15''S)			42147	Magalhães, Brescovit & Santos 2013	Caatinga; Cerrado	Indeterminated	559	2022-02-25	826
	Guanambi	Airport	(42°44’W, 14°12’S)			124092	Magalhães, Brescovit & Santos 2013	Caatinga; Cerrado	Urban	530	2022-03-25	491
	Guanambi	Ceraíma, 15 Km SE	(42°41'16.3''W, 14°17'2.4''S)				Magalhães, Brescovit & Santos 2013	Caatinga; Cerrado	Indeterminated	577	2022-03-25	491
	Guanambi	Fazenda do Fabiano	(42°43'56.4''W, 14°10'17.6''S)				Magalhães, Brescovit & Santos 2013	Caatinga; Cerrado	Indeterminated	539	2022-03-25	491
	Jaborandi	Fazenda Jatobá	(46°0'12''W, 13°55'54''S)				Magalhães, Brescovit & Santos 2013	Caatinga; Cerrado	Indeterminated	448	25.0	705
	Palmas de Monte Alto	Serra do Monte Alto	(43°09'43"W, 14°16'03"S)			161076; 161077; 161078; 161079; 161080	Magalhães, Brescovit & Santos 2013	Caatinga	Indeterminated	802	2022-05-25	621
	São Félix do Coribé	Indeterminated	(44°11'40"W, 13°24'03"S)				Magalhães, Brescovit & Santos 2013	Caatinga	Indeterminated	40	26.0	794
Total of individuals per collection				-	-	10											-	-	-
Sicarius jequitinhonha	Itapetinga	Indeterminated	(40°14'52"W, 15°14'57"S)			166469; 166470; 166471; 166472	Magalhães, Brescovit & Santos 2017	Atlantic Forest	Indeterminated	279	2022-02-23	816
Total of individuals per collection				-	-	8
Sicarius ornatus	Andaraí	Igatu	(41°19'10"W, 12°53'44"S)				Magalhães, Brescovit & Santos 2013	Caatinga	Indeterminated	405	2022-08-22	733
	Cachoeira *	Rio da Prata, Fazenda Caimbongo	(38°57'21"W, 12°37'06"S)	4671				Atlantic Forest	Dense Rainy Forest	5	2022-01-24	892
	Iramaia	Gruta do Calixto	(41°3'48''W, 13°17'35''S)				Magalhães, Brescovit & Santos 2013	Caatinga	Cave	607	2022-08-22	675
	Itaetê	Surroundings of Gruta Natal, Fazenda Rio Alegre	(40°58' 20"W, 12°59'12"S)				Magalhães, Brescovit & Santos 2013	Caatinga	Cave	321	24.0	623
	Ituaçu	Gruta da Mangabeira	(41°17'47"W, 13°48'48"S)		11018, 11019	10236, 162249, 162250, 162252, 162253, 162254, 166325, 166326	Magalhães, Brescovit & Santos 2013	Caatinga	Cave	522	2022-05-21	967
	Jequié	Indeterminated	(40°05'00"W, 13°51'28"S)			70973	Magalhães, Brescovit & Santos 2013	Caatinga; Atlantic Forest	Indeterminated	215	23.0	889
	Maracás	Close to Ferbasa	(40°26'17''W, 13°28'16''S)				Magalhães, Brescovit & Santos 2013	Caatinga; Atlantic Forest	Indeterminated	954	21.0	750
	Milagres	Indeterminated	(39°51'27.9''W, 12°54'54.2''S)		11039, 11042	161081, 161082, 161085, 161088, 161089, 161091, 161092, 161093, 161094, 161096, 161098, 161099, 161100, 161101, 161102	Magalhães, Brescovit & Santos 2013	Caatinga; Atlantic Forest	Indeterminated	419	2022-01-23	464
	Mucugê	Reserva Particular do Patrimônio Natural Adília Paraguaçu Batista	(41°22'15"W,13°00'19"S)			56507	Magalhães, Brescovit & Santos 2013	Caatinga	Indeterminated	983	2022-07-19	1017
Total of individuals per collection				1	4	28
Sicarius saci	Barra	Vila de Ibiraba, dunas do São Francisco	(43°21'10"W, 10°48'27"S)	5224, 2579; 5044; 5050; 5054; 5055; 5080; 5236; 5262		162247, 162688, 162690, 162691	Magalhães, Brescovit & Santos 2017	Caatinga	Indeterminated	450	2023-04-27	559
	Barra	Brejo Olhos D´água *	(43°21'9.7''W, 10°48'26.8''S)				Magalhães, Brescovit & Santos 2017	Caatinga	Dunes; Restinga	450	2023-04-27	559
	Lençóis	Indeterminated	(41°23'23"W, 12°33'48"S)				Magalhães, Brescovit & Santos 2017	Caatinga	Indeterminated	394	2022-08-21	637
	Morro do Chapéu	Casto	(41º22'7,9"W, 11º28'39,2"S)			162258, 162259, 162260.	Magalhães, Brescovit & Santos 2017	Caatinga	Rupestrian grassland	761	2023-07-20	544
	Morro do Chapéu	Parque Estadual	(41º19'49.3''W, 11º29'51.2'S')			162262, 162264, 162265, 162266, 162267, 162268, 162269	Magalhães, Brescovit & Santos 2017	Caatinga	Dunes	949	2023-07-20	544
	Morro do Chapéu	Parque Estadual	(41º15'5,2"W, 11º29'56,9"S)			162272, 162273, 162274	Magalhães, Brescovit & Santos 2017	Caatinga	Rupestrian grassland and pasture	1134	2023-07-20	544
	Xique-Xique	Indeterminated	(42º43'51"W, 10º49'19"S)			162285, 162286, 162287, 162288, 162695	Magalhães, Brescovit & Santos 2017	Caatinga	Indeterminated	475	2022-02-27	484
Total of individuals per collection				19	-	22
Sicarius tropicus	Caetité *	Indeterminated	(42°28'29"W, 14°04'10"S)	3606				Caatinga; Cerrado	Dunes; Steppe Savanna Park	824	22	885
	Curaçá *	Riacho Seco	(39°54'33"W, 8°59'26"S)			161057, 161058, 161059, 161061, 161062, 161064, 161065, 161066, 161067, 161068, 161069, 161070, 161071, 161072, 161073, 161074, 161075, 161083, 161084		Caatinga	Indeterminated	330	2022-07-26	413
	Cruz das Almas *	Reconcavo Baiano	(39°06'06"W, 12°40'13"S)			86511		Atlantic Forest	Indeterminated	220	2022-07-23	1161
	Milagres *	Indeterminated	(39°51'27,9"W, 12°54'54,2"S)			161086, 161087, 161090, 161095, 161097		Caatinga; Atlantic Forest	Indeterminated	419	2022-01-23	464
Total of individuals per collection				1	-	28
Total of records				197	36	208

## Sheet: Planilha2
LISTA DE MUNICÍPIOS
Andaraí		Cachoeira *
Barra		Caetité *
Buritirama
Cachoeira *
Caetité *
Campo Formoso		Campo Formoso
Canudos		Canudos
Carinhanha
Central
Cocos
Cruz das Almas *
Curaçá *
Gentio do Ouro *		Central
Guanambi *		Curaçá
Ibicoara*		Gentio do Ouro *
Iraquara		Itaguaçu da Bahia
Itaetê		Jaborandi
Itaguaçu da Bahia		Jaguarari
Itapetinga		Lajedinho *
Ituaçu *		Miguel Calmon
Iuiu		Paripiranga
Jaborandi		Paulo Afonso
Jacobina*		Queimadas
Jaguarari		Salvador
Jequié		Santa Teresinha
Lajedinho *		Senhor de Bonfim
Lençóis		Una *
Malhada
Maracás *
Miguel Calmon
Milagres
Morro do Chapéu
Mucugê
Palmas de Monte Alto
Palmeiras*
Paripiranga
Pau Brasil *
Paulo Afonso
Pé de Serra*
Queimadas
Salvador
Santa Rita de Cássia *
Santa Teresinha
São Félix do Coribé
Senhor de Bonfim
Ubaíra*
Una *
Xique - Xique
